# Supplementary material for: Strongly coupled hybrid nanostructures for selective hydrogen detection – understanding the role of noble metals in reducing cross-sensitivity
Source: Royal Society of Chemistry journal article supplement (doi:10.1039/c3nr06569c), 2014-01-01
Supplement: c3nr06569c1.pdf [file c3nr06569c1.pdf]

## Supporting Information for

### **Strongly coupled hybrid nanostructures for selective hydrogen detection – understanding the role of noble metals in reducing cross-sensitivity**

***Bin Liu,<sup>a</sup> Daoping Cai,<sup>b</sup> Yuan Liu,<sup>a</sup> Dandan Wang,<sup>a</sup> Lingling Wang,<sup>a</sup> Wuyuan Xie,<sup>c</sup> Qiuhong Li<sup>\*a</sup> and Taihong Wang<sup>\*a</sup>***

<sup>a</sup> *Pen-Tung Sah Institute of Micro-Nano Science and Technology of Xiamen University, Xiamen, 361005, China.*

<sup>b</sup> *Department of Chemistry, College of Chemistry and Chemical Engineering, Xiamen University, Xiamen, 361005, China*

<sup>c</sup> *Department of Physics, School of Physics and Mechanical & Electrical Engineering, Xiamen University, Xiamen, 361005, China*

Corresponding author: Qiuhong Li, Email: [liqiuhong2004@hotmail.com](mailto:liqiuhong2004@hotmail.com); Taihong Wang, Email: [thwang@xmu.edu.cn](mailto:thwang@xmu.edu.cn)

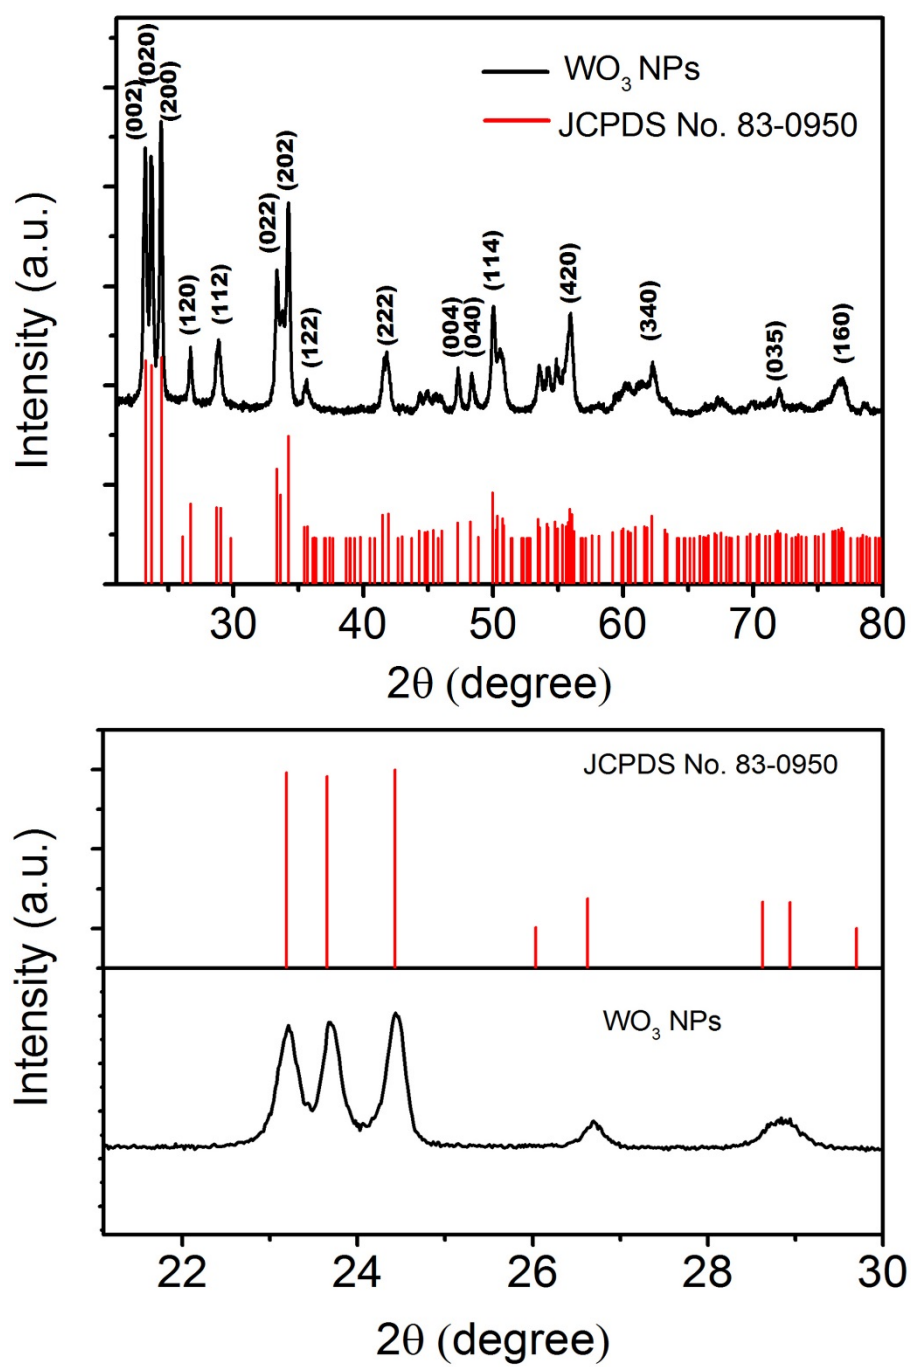

Fig. S1 (a) XRD pattern of the  $\text{WO}_3$  NPs. (b) Detailed peak position comparison of the  $\text{WO}_3$  NPs with the reference pattern taken from JCPDS No. 83-0950.<sup>1</sup>

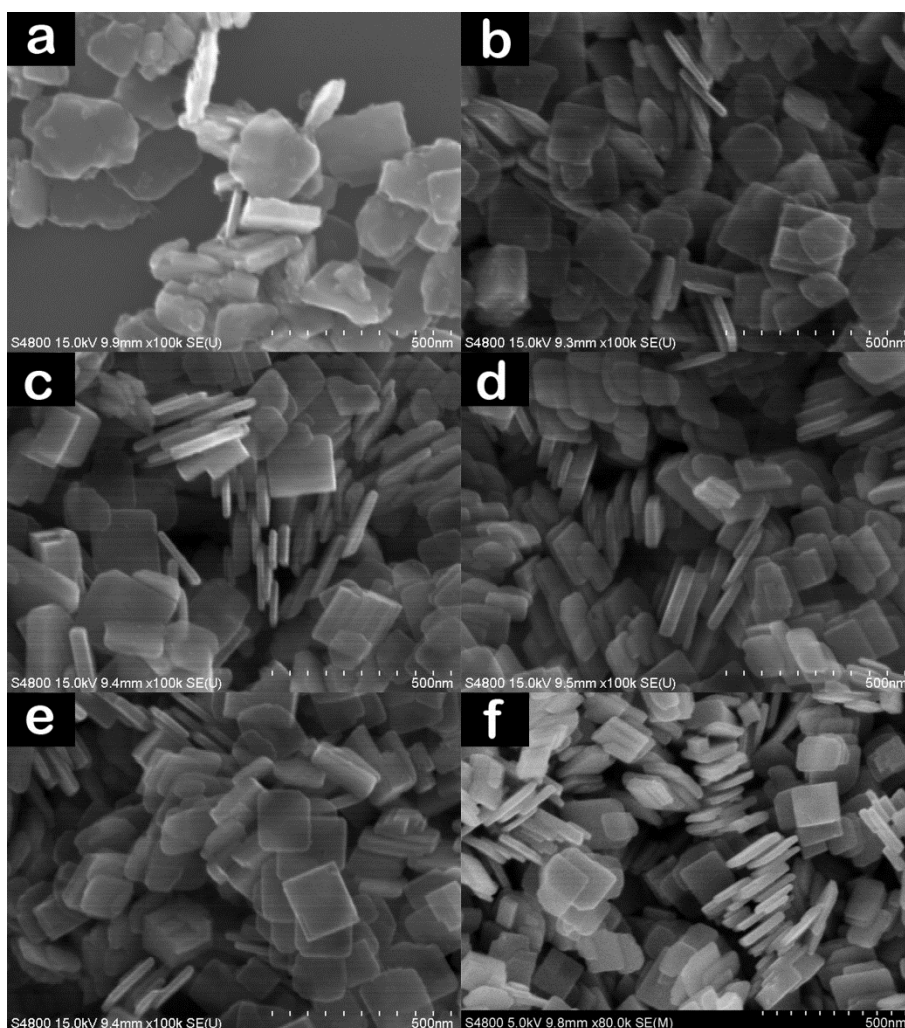

Fig. S2 SEM images of the  $\text{WO}_3$  NPs synthesized by adding different amount of hydrochloric acid: (a) 0.1 mL, (b) 0.2 mL, (c) 0.4 mL, (d) 0.6 mL, (e) 0.8 mL and (f) 1.0 mL.

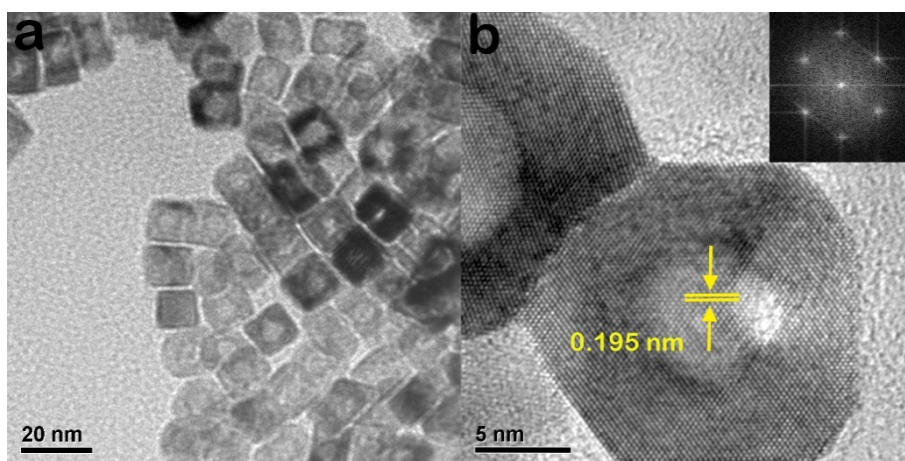

Fig. S3 TEM (a) and high resolution TEM (b) images of the Pt/Pd bimetallic nanocubes.

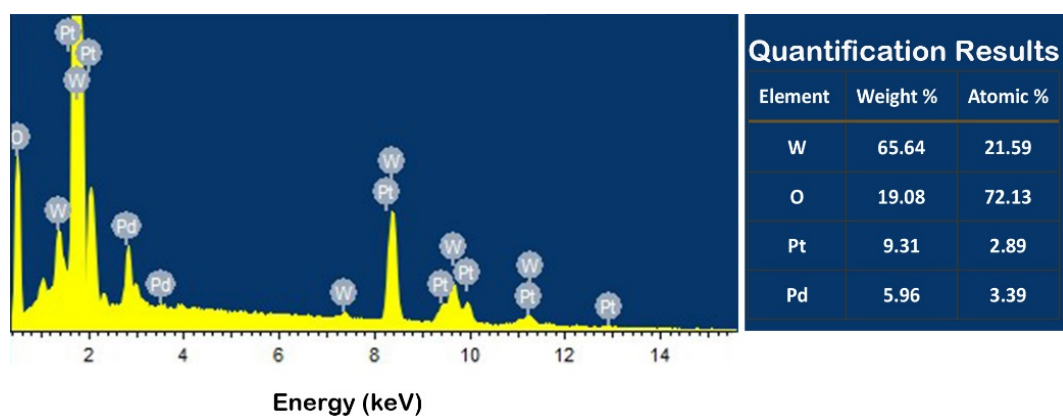

Fig. S4 EDX spectrum and the quantification analysis results of the Pt/Pd-WO<sub>3</sub> hybrid nanostructures.

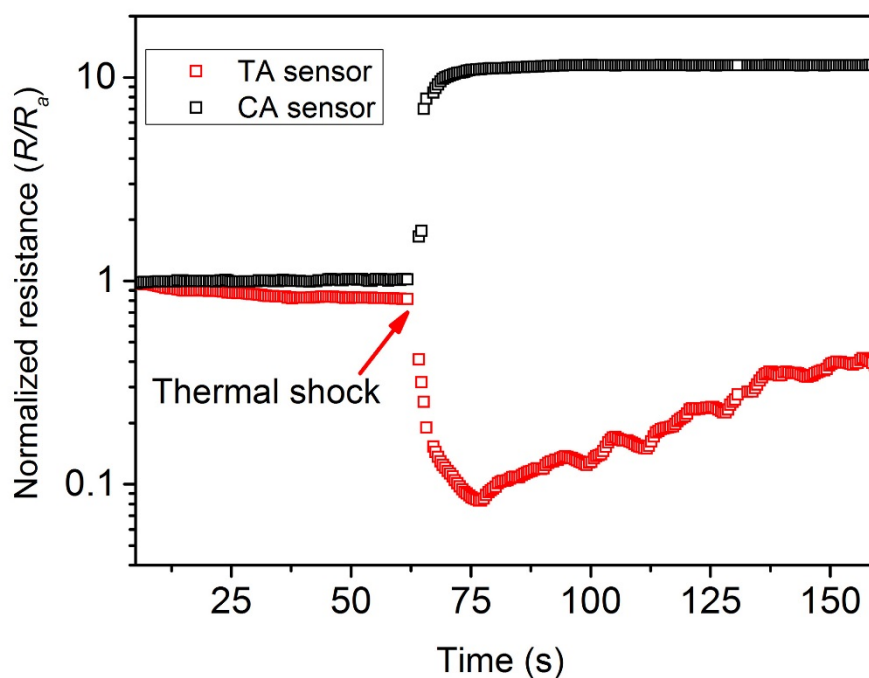

Fig. S5 The resistance change of the TA and CA sensor under a thermal shock (rapid heating from room temperature to 80°C). The slight decrease in the resistance of the TA sensor in the first minute is most probably caused by the self-heating effect.<sup>2</sup>

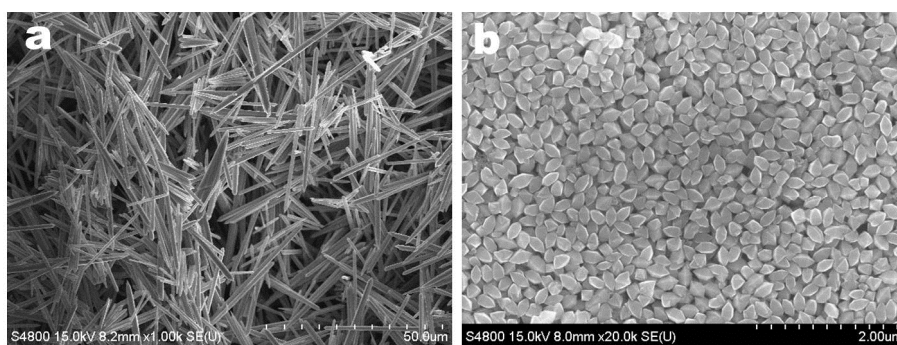

Fig. S6 SEM images of the ZnO columns and SnO<sub>2</sub> octahedrons synthesized according to Ref. S3 and Ref. S4, respectively.

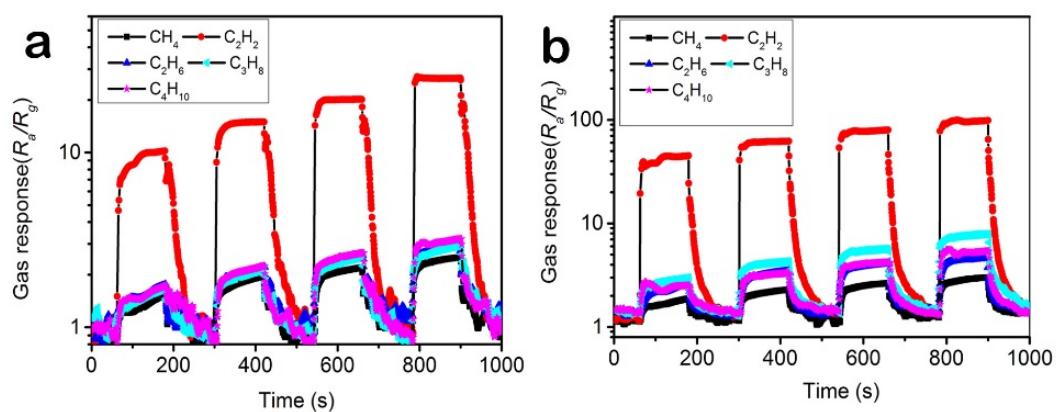

Fig. S7 Transient responses of the TA sensors made from ZnO (a) and SnO<sub>2</sub> (b) to different hydrocarbon gases.

| Gas                            | Structure                                                                         | HOMO (eV) | R_WO <sub>3</sub> | R_ZnO | R_SnO <sub>2</sub> |
|--------------------------------|-----------------------------------------------------------------------------------|-----------|-------------------|-------|--------------------|
| CH <sub>4</sub>                | 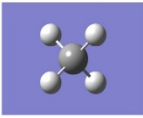 | -12.5     | 5.5               | 2.1   | 2.23               |
| C <sub>2</sub> H <sub>2</sub>  | 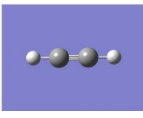 | -9.8      | 12.1              | 20.1  | 77.7               |
| C <sub>2</sub> H <sub>6</sub>  | 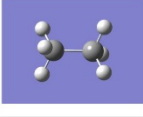 | -11.1     | 5.8               | 2.4   | 3.9                |
| C <sub>3</sub> H <sub>8</sub>  | 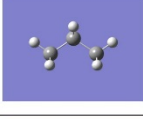 | -10.6     | 5.7               | 2.4   | 5.5                |
| C <sub>4</sub> H <sub>10</sub> | 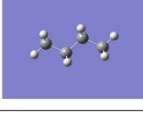 | -10.4     | 5.6               | 2.5   | 4.1                |

Table S1 Summary of the molecular structures, HOMO energy levels and responses of the three TA sensors to different hydrocarbon gases with a concentration of 0.1 vol%.

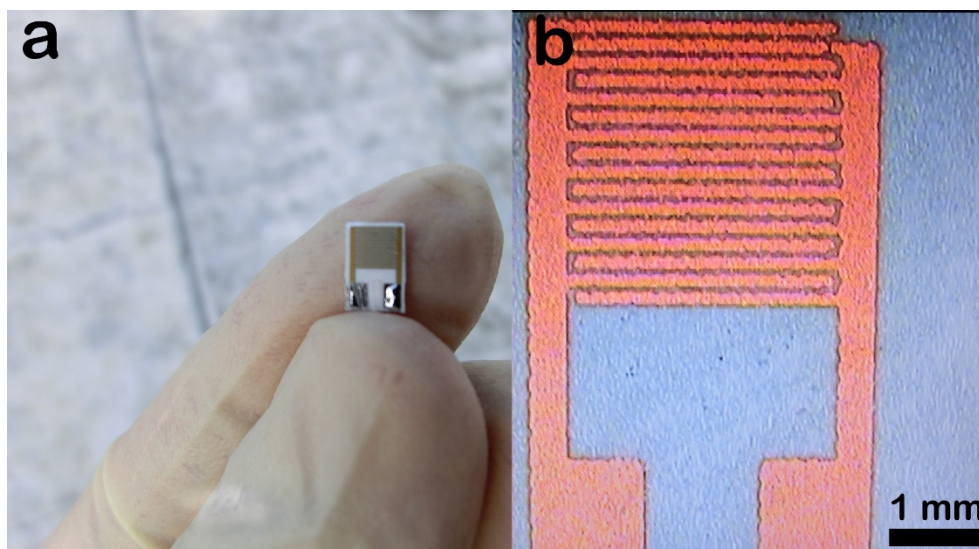

Fig. S8 Optical images of the device, showing the dimensions of the sensor.

1. P. M. Woodward, A. W. Sleight and T. Vogt, *J Phys Chem Solids*, 1995, 56, 1305-1315.
2. E. Strelcov, S. Dmitriev, B. Button, J. Cothren, V. Sysoev and A. Kolmakov, *Nanotechnology*, 2008, 19, 355502
3. Xi-Guang Han, Hui-Zhong He, Qin Kuang,\* Xi Zhou, Xian-Hua Zhang, Tao Xu, Zhao-Xiong Xie,\*

Lan-Sun Zheng, *J. Phys. Chem. C*, 2009, 113, 584.

4. X.G. Han, M.S. Jin, S.F. Xie, Q. Kuang,\* Z.Y. Jiang, Y.Q. Jiang, Z.X. Xie,\* L.S. Zheng, *Angew. Chem. Int. Ed.*, 2009, 48, 9180-9183.
